# Supplementary material for: Characterization of an ultrathin polymer optode and its application to temperature sensors based on luminescent europium complexesElectronic supplementary information (ESI) available: surface plasmon curves and X-ray diffraction pattern of p(DDA-Eu(TTA)3Phen) LB films. See http://www.rsc.org/suppdata/jm/b3/b307309b/
Source: Royal Society of Chemistry journal article supplement (doi:10.1039/b307309b), 2003-01-01
Supplement: b307309b.pdf [file b307309b.pdf]

## **Supporting Information**

**Characterization of ultrathin polymer optode and its application to temperature sensors based on luminescent europium complexes**

**Masaya Mitsuishi<sup>1</sup>, Shinji Kikuchi<sup>1</sup>, Tokuji Miyashita<sup>1</sup>, and Yutaka Amao<sup>2</sup>**

<sup>1</sup>IMRAM, Tohoku University

<sup>2</sup>Oita University

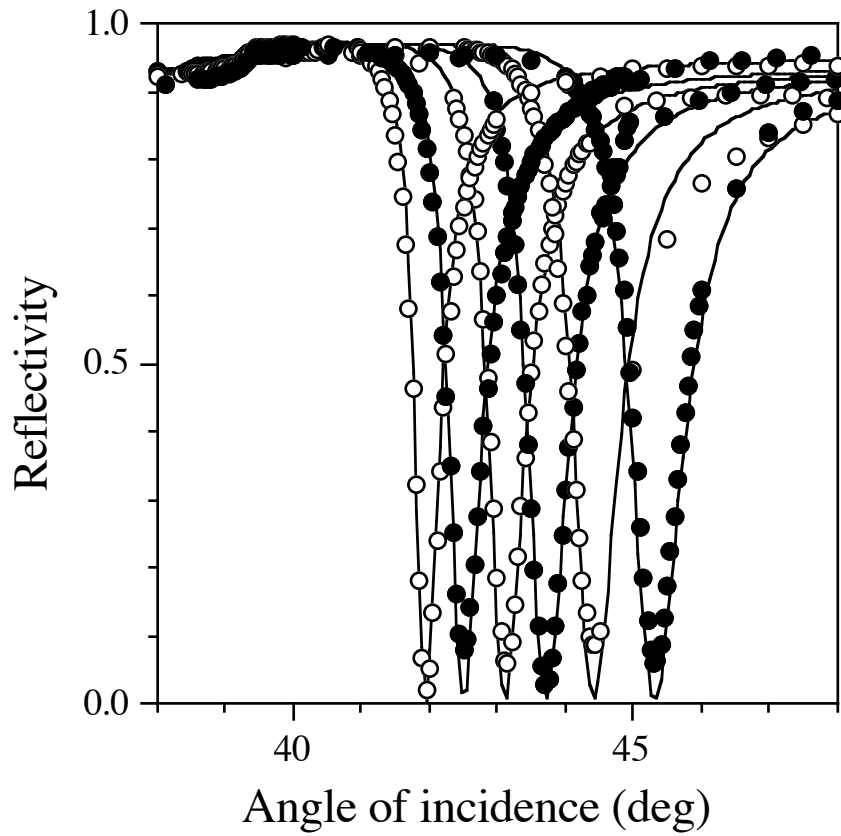

Fig. 1S. Surface plasmon curves for p(DDA-Eu(TTA)<sub>3</sub>Phen) LB films on silver substrate; from left bare Ag, and 2, 4, 6, 8, and 10 layers. Optical parameters of the silver layer was as follows: dielectric constant  $\epsilon = -16.3 + 0.67i$ , and the thickness  $d = 53$  nm.

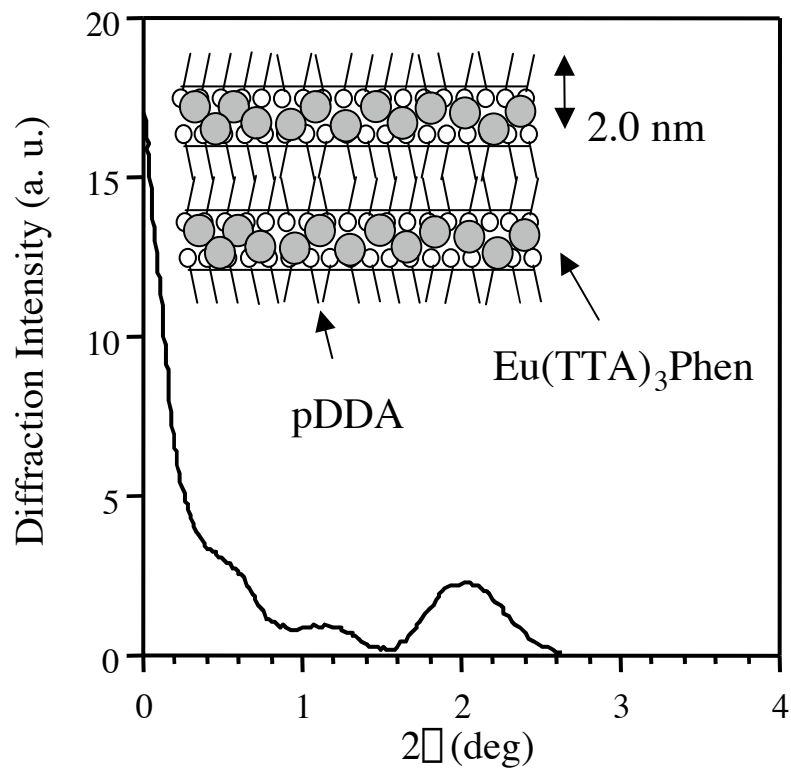

Fig. 2S X-ray diffraction pattern of p(DDA-Eu(TTA)<sub>3</sub>Phen) LB films with 10 layers. (inset) Schematic illustration for the layer structure of p(DDA-Eu(TTA)<sub>3</sub>Phen) LB films.
